# Supplementary material
Source: PubMed Central journal article supplement (PMC8897257)
Supplement: NIHMS1764291-supplement-2.pdf [file NIHMS1764291-supplement-2.pdf]

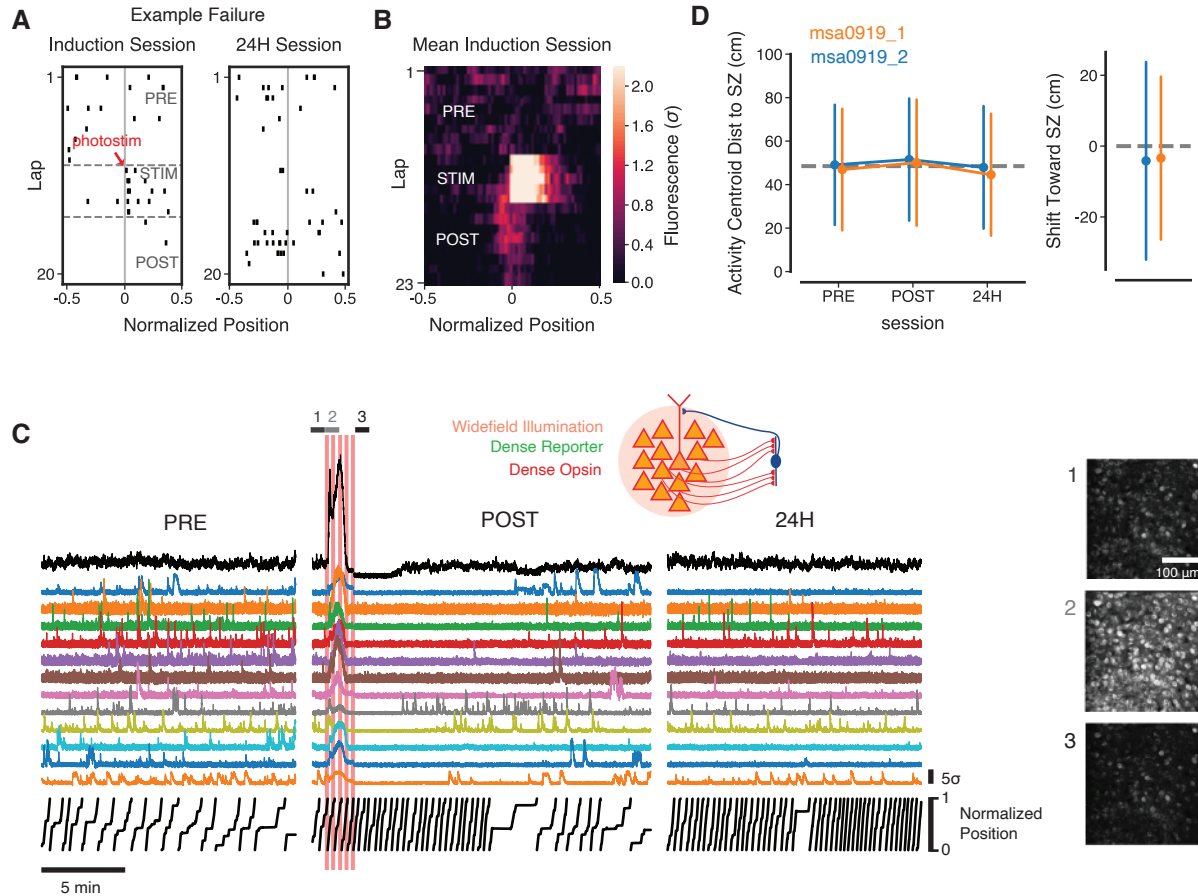

**Figure S1. Widefield photostimulation of all CA1PCs leads to epileptiform-like activity without spatial overrepresentation of the SZ.** (Related to Figure 1). **(A)** Raster of the running-related activity (deconvolved events) of an example cell in which opto-PFi failed. Induction session and 24H follow-up session shown as in Fig 1D. **(B)** Heatmap of fluorescence ( $z$ -scored) across all stimulated cells during induction sessions. **(C)** Calcium activity before, during, and after induction protocol in an example CaMKII-Cre mouse virally expressing (ChRmine)<sup>Cre</sup> and (GCaMP6f)<sup>Cre</sup> in all CA1PCs. *Top*, Schema of circuit during widefield optogenetic stimulation. Mean  $z$ -scored fluorescence activity (black, top) and activity of 12 example cells shown for each session with normalized position below. Red bars indicate photostimulation periods. *Bottom*, Normalized position of mouse over time on the treadmill belt; each black trace represents an individual lap. Note that mouse continues to run after photostimulation during the minutes-long, FOV-wide suppression of unit activity followed by slow recovery. *Right*, Time-averaged FOV during the numbered 1500 frame-long ( $\sim 50$ s) periods in POST session immediately before, during, and after photostimulation indicated at the top of **C**. **(D)** *Left*, Activity centroid distance from the stimulation zone for all cells in each of two mice during each session. *Right*, Shift toward the stimulation zone from PRE to POST for all cells. Data are represented as mean  $\pm$  sd.

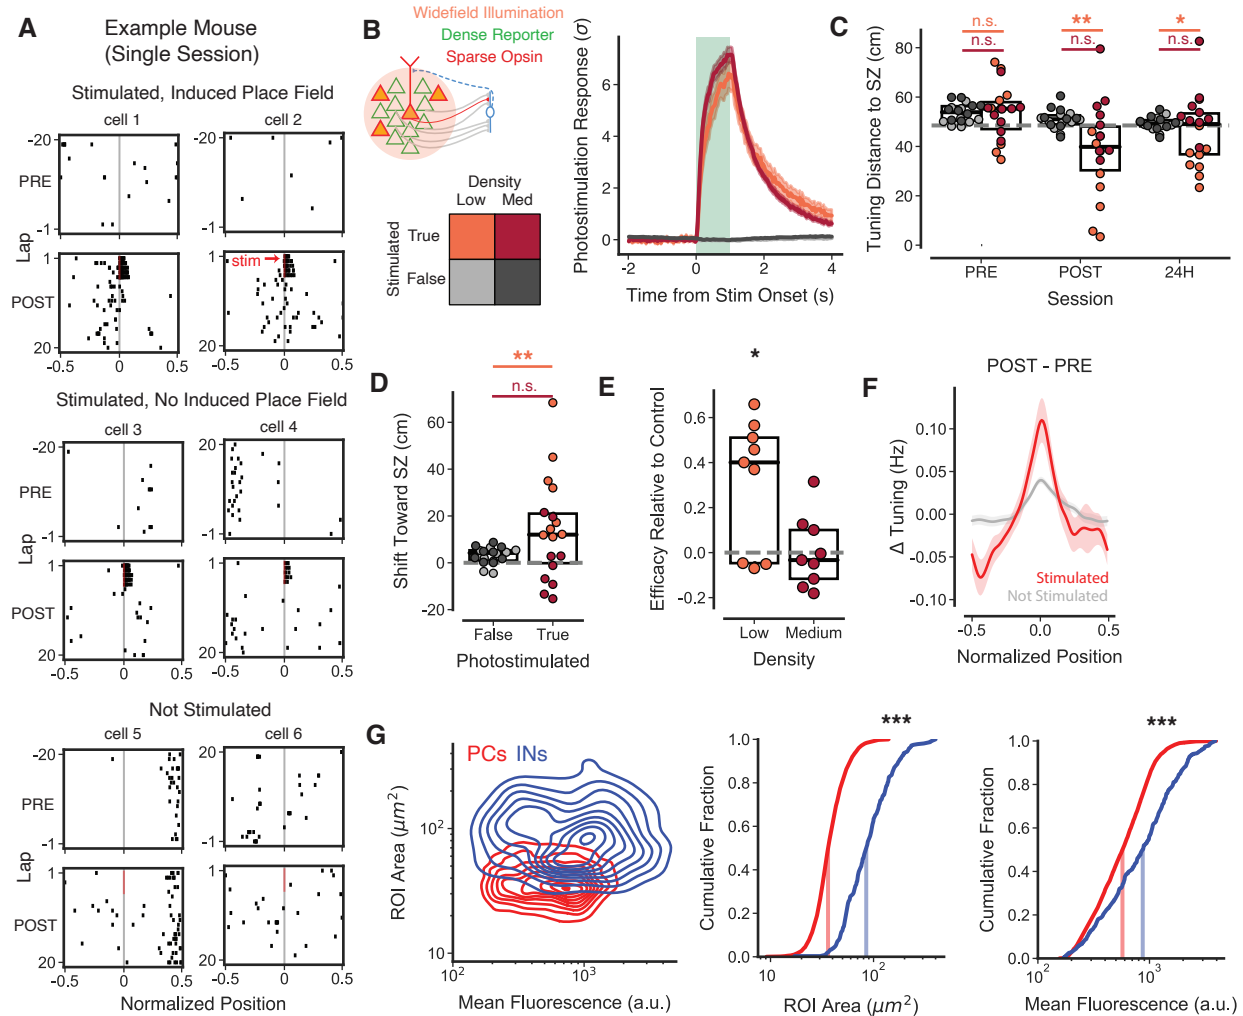

**Figure S2. Unstimulated neighboring cells do not show peri-SZ activity bias and putative interneurons are clearly separable from CA1PCs based on morphology.** (Related to Figure 2). **(A)** Raster of the running-related activity (deconvolved events) for example cells from a single widefield photostimulation induction experiment, including PRE and POST sessions. **(B) Left**, schema of circuit during widefield photostimulation of sparse CA1PC subpopulation. **Right**, mean z-scored fluorescence of cells in response to photostimulation. Green highlighting indicates photostimulation period. Data divided into Low and Medium Density experiments as in Fig 2C-E and grouped by cells showing photostimulation responses (Stimulated) vs. no response (Unstimulated; see *Methods*). Low Density Stimulated (orange):  $n = 43$  cells, 9 mice; Low Density Unstimulated (light gray):  $n = 2395$  cells, 9 mice; Medium Density Stimulated (rouge):  $n = 204$  cells, 9 mice; Medium Density Unstimulated (dark gray):  $n = 3245$  cells, 9 mice. **(C)** Mean tuning Distance to SZ for unstimulated and stimulated cells in each experiment ( $n = 9$  mice for each group). **(D)** Mean activity centroid shift toward SZ from PRE to POST. **(E)** Difference in induction efficacy (i.e., fraction of cells with new place field near SZ during POST) for stimulated vs unstimulated cells in each experiment separated by density. In **C, D**, individual data points represent mean across cells for a single mouse FOV. For **C-E**, boxes indicate median and interquartile range for all points. Colors indicate density group as defined in **B** and Figure 2D. Asterisks indicate significant difference, colored by density group (paired Student's t-test, unstimulated vs. stimulated or one-sample Student's t-test against null hypothesis of 0 **(E)**). **(F)** Change in tuning from PRE to POST for stimulated and unstimulated cells. Shading indicates mean  $\pm$  sem. Note the unstimulated population shows some increase in tuning near the SZ due to exclusion of peri-SZ PFs in PRE (see *Methods*). **(G) Left**, Distribution of mean time-averaged ROI fluorescence and surface area for PCs (red;  $n = 4103$ ) in *s. pyramidale* and putative interneurons (blue;  $n = 317$ ) in *s. oriens* in experiments shown in Fig 2I-K (6 mice). **Center**, cumulative distribution ROI sizes for PCs in *s. pyramidale* and putative interneurons in *s. oriens*. **Right**, cumulative distribution of ROI brightness for PCs and putative *s. oriens* interneurons. Vertical lines indicate median. Asterisks indicate difference via unpaired Student's t-test.

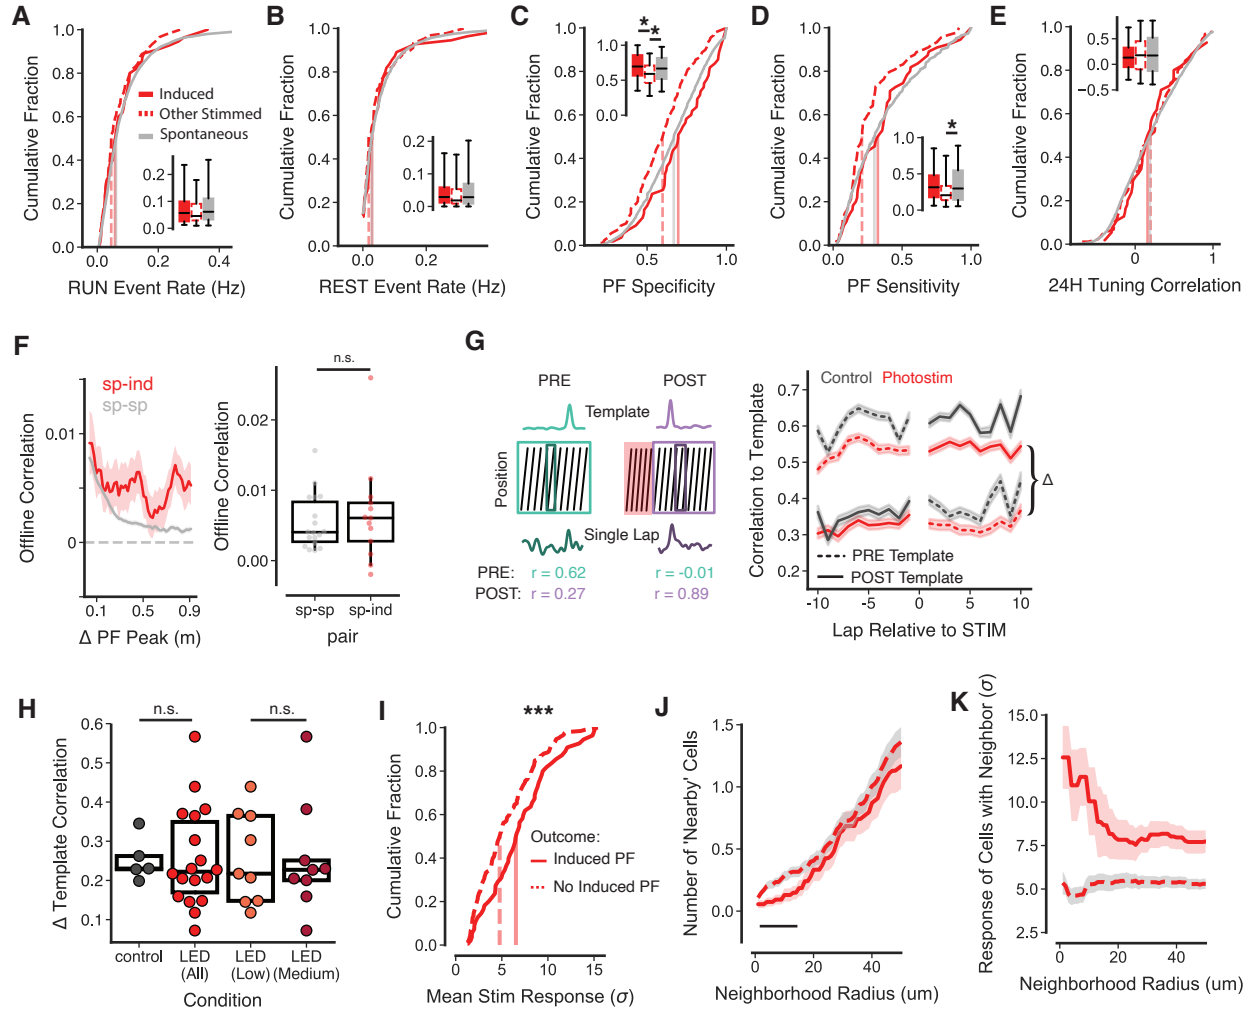

**Figure S3. Characteristics of CA1PCs with PFs induced through opto-PFi.** (Related to Figures 2 and 3). **(A)** Distribution of event rates during POST mobility for cells with induced PFs (solid red;  $n = 55$ ), other photostimulated cells with spontaneous PFs away from the SZ (dashed red;  $n = 85$ ), and unstimulated cells with spontaneous PFs (gray;  $n = 3592$ );  $n = 18$  mice. **(B)** Distribution of event rates for POST immobility epochs. **(C)** Distribution of PF specificity (fraction mobility-related events occurring inside the PF). **(D)** Distribution of PF sensitivity (fraction PF traversals with detected events). **(E)** Distribution of 24h tuning stability (the Pearson's correlation between tuning curves from POST and 24H sessions). For **A-E,I**, vertical lines indicate median. Inset indicates interquartile range and 95% confidence interval for each group. Asterisks indicate  $p < 0.05$  for Tukey's test after  $p < 0.05$  for one-way ANOVA. **(F)** *Left*, pairwise signal correlations during immobility ('offline') between spontaneous-spontaneous (s-s,  $n=550594$  pairs) and spontaneous-induced (s-i,  $n=22608$  pairs) place cells, binned by pairwise PF peak distance in a sliding window of 4 spatial bins (7.76 cm). *Right*, mean across all pairs/distances by experiment. Difference between groups is not significant (independent Student's  $t$ -test,  $p=0.5544$ ). **(G)** *Left*, schematic of template-based lap-by-lap remapping analysis. Note that PRE and POST are separated by a  $\sim 20$  min home cage rest period (Fig 2B). For each of the ten laps before (PRE) and after (POST) STIM, the correlation of a place cell's tuning on that lap to the mean tuning during either the PRE or POST session is computed. *Right*, Pearson's correlation of cells to PRE or POST templates for each lap around STIM. Data from photostimulation experiments (red) or opsin-negative controls (black). Note the large change ( $\Delta$ ) in correlations during POST (laps  $> 0$ ) for both photostimulated and control mice, suggesting broad PF remapping at baseline (Fig 2B). **(H)** Difference in mean POST lap correlation from PRE template to POST template by experiment ( $\Delta$  in **G**). Independent Student's  $t$ -test; control vs all:  $p = 0.961$ ; low vs medium:  $p = 0.973$ . **(I)** Mean stimulation response amplitude for photostimulated cells with successful PF induction (solid;  $n = 55$ ) vs other photostimulated cells (dashed;  $n = 192$ ). Induced:  $6.79 \pm 0.48$ ; Non-induced:  $5.36 \pm 0.22$ ;  $p = 0.0039$  independent Student's  $t$ -test. **(J)** Mean number of stimulated cells (regardless of whether they developed induced PFs or not) within a given radius for successfully induced vs other photostimulated cells. Black bar indicates  $p < 0.05$  for independent Student's  $t$ -test at each  $1 \mu\text{m}$  bin. **(K)** Mean stimulation response (z-scored fluorescence) for photostimulated cells with at least one photostimulated neighbor in the given radius. Shading indicates mean  $\pm$  sem.

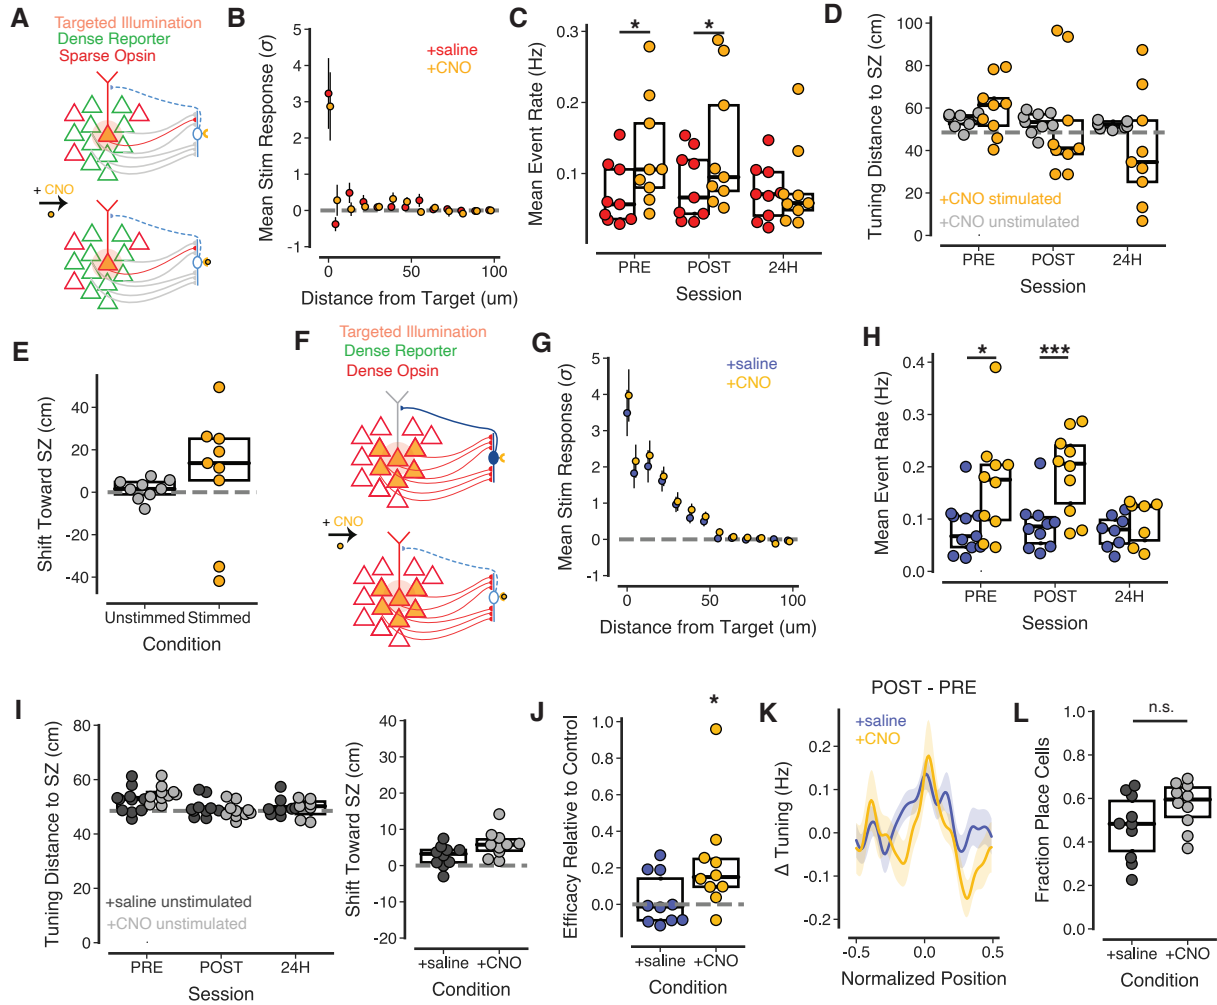

**Figure S4. Suppression of inhibition enhances opto-PFI efficacy only during ensemble co-activation.** (Related to Fig 3). **(A)** Schema of 2p targeted stimulation during sparse excitatory opsin expression as in Fig 3A-E. Relates to panels **B-E**. **(B)** Photostimulation response is local to targeted cell in sparse preparation with or without GiDREADD-mediated suppression of local interneuron activity with CNO. +saline:  $n = 1750$  cells, +CNO:  $n = 1785$  cells. Bars indicate mean $\pm$ sem. Independent Student's t-test between groups,  $p > 0.05$  for all bins. **(C)** CNO administration indirectly increases event rates for unstimulated PCs during PRE and POST, but effect washes out by 24h. Asterisks for one-sided paired Student's t-test.  $n = 9$  mice. **(D)** Activity centroid distance to SZ for stimulated and unstimulated cells in +CNO condition (compare to Fig 3D). **(E)** Shift toward SZ for stimulated and unstimulated cells in +CNO condition (compare to Fig 3D). **(F)** Schema of 2p targeted photostimulation during dense excitatory opsin expression as in Fig 3F-I. Relates to panels **G-K**. **(G)** Same as **B** but for dense opsin expression. Photostimulation response spreads to  $\sim 50\mu\text{m}$  around targeted cell in both conditions. +saline:  $n = 2369$  cells, 5 mice; +CNO:  $n = 2230$  cells, 4 mice. **(H)** Same as **C**. **(I)** Activity centroid distance to SZ (*Left*) and shift toward SZ from PRE to POST (*Right*) for unstimulated cells in each condition. Compare to Fig 3G,I. **(J)** Difference in efficacy (Fraction of cells with peri-SZ PF formation) for stimulated cells and unstimulated cells in each condition. Induction efficacy is higher than unstimulated control peri-SZ PF formation rate only after interneuron suppression. mean $\pm$ sem; +saline:  $0.0240\pm 0.0443$ ; +CNO:  $0.2240\pm 0.0902$ . One-sample Student's t-test against null hypothesis of 0: +saline:  $p = 0.6015$ ; +CNO:  $p = 0.0350$ . **(K)** Change in tuning from PRE to POST for stimulated cells. Shading indicates mean $\pm$ sem. **(L)** Fraction of place cells in the unstimulated population is not changed by CNO administration. Independent Student's t-test:  $p = 0.0710$ .
